# Supplementary material for: Enhanced gene transfection efficiency by use of peptide vectors containing laminin receptor-targeting sequence YIGSR
Source: Royal Society of Chemistry journal article supplement (doi:10.1039/c7nr05843h), 2017-12-12
Supplement: c7nr05843h1.pdf [file c7nr05843h1.pdf]

Supporting Information

# **Enhanced Gene Transfection Efficiency by Use of Peptide Vectors Containing Laminin Receptor Targeting Sequence YIGSR**

*Zhao Meng<sup>‡</sup>, Ziyao Kang<sup>‡</sup>, Chao Sun, Sen Yang, Siliang Feng, Baoquan Zhao,  
Qingbin Meng\*, Keliang Liu\**

State Key Laboratory of Toxicology and Medical Countermeasures, Beijing Institute of  
Pharmacology and Toxicology, 27 Taiping Road, Beijing, 100850.

\*Corresponding author (Keliang Liu): Email: keliangliu55@126.com; Fax: +86-10-  
68211656; Tel: +86-10-68169363.

\*Corresponding author (Qingbin Meng): Email: nankaimqb@sina.com; Fax: +86-10-  
68211656; Tel: +86-10-68169363.

<sup>‡</sup>The two authors contributed equally.

Figure S1 MALDI-TOF mass of peptide vectors

P-01

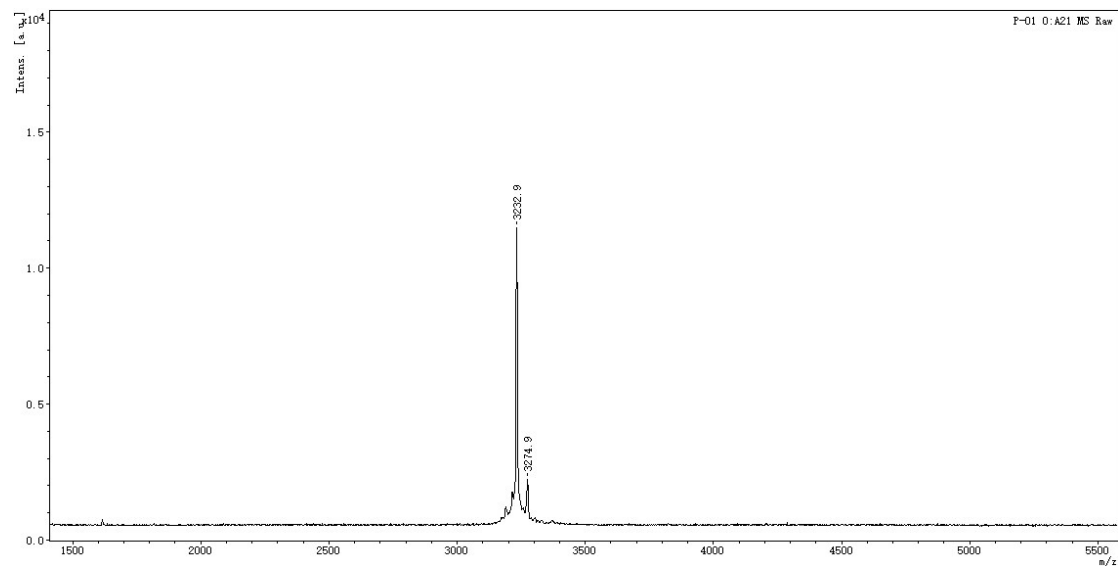

P-02

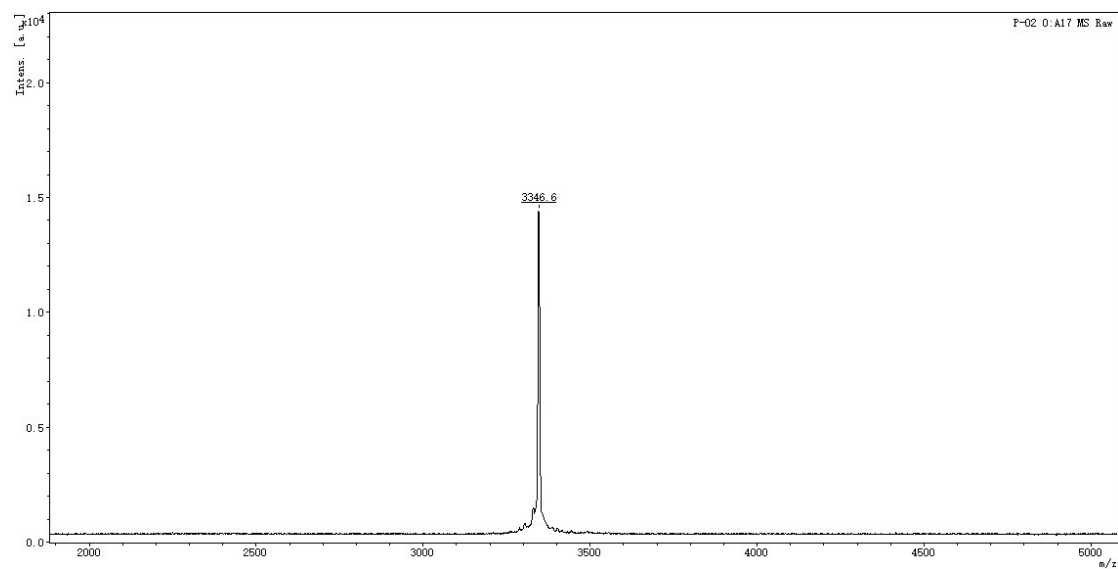

P-03

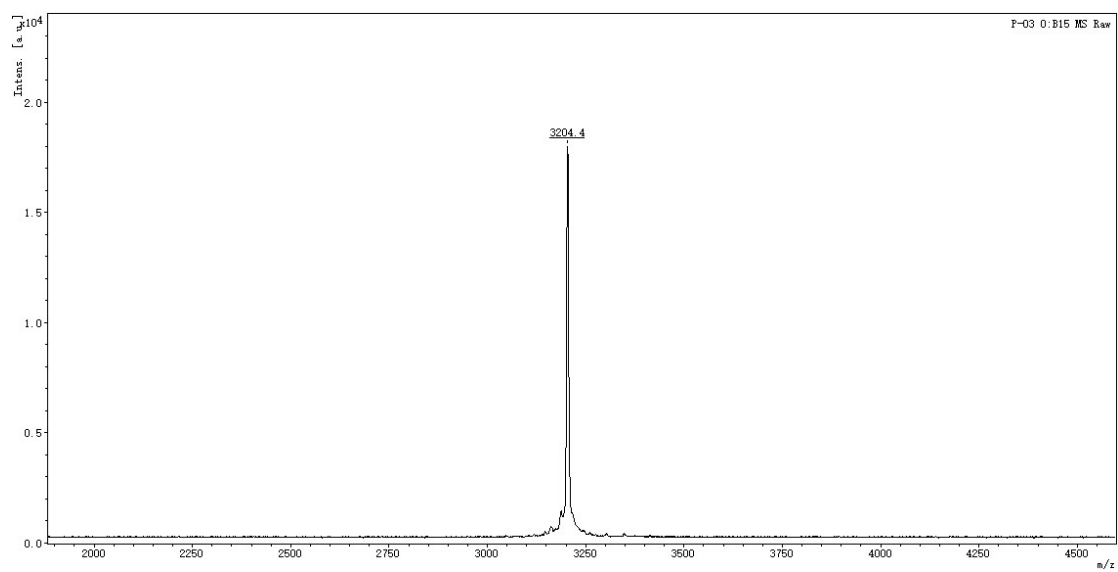

P-04

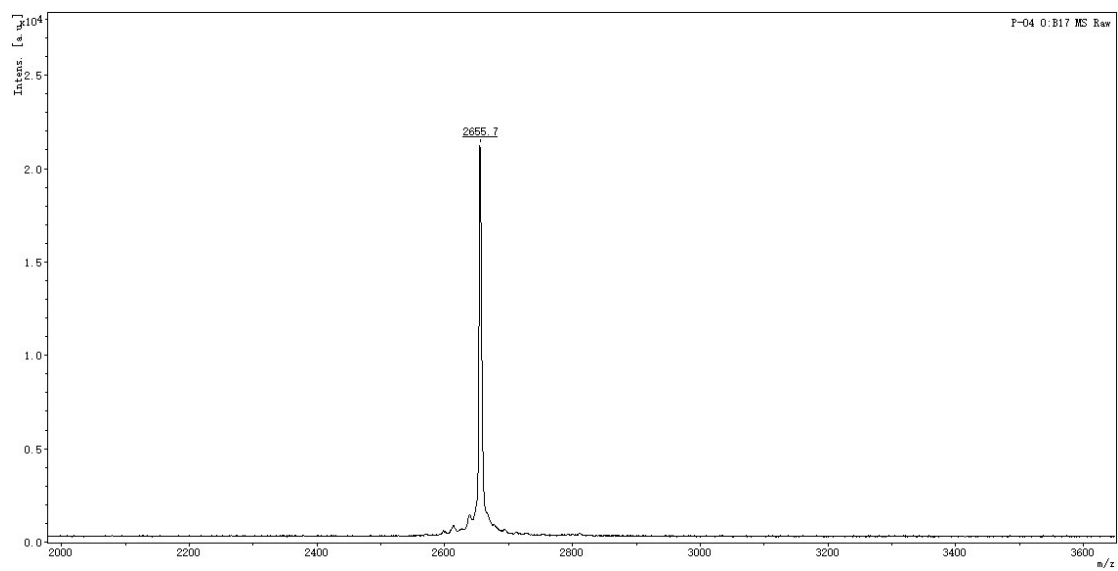

P-05

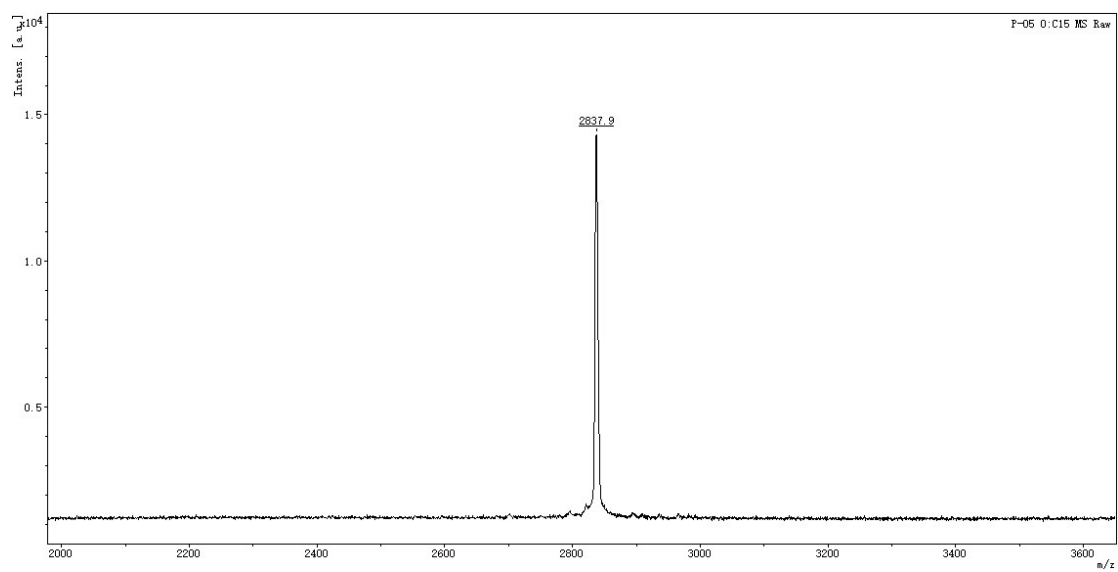

P-06

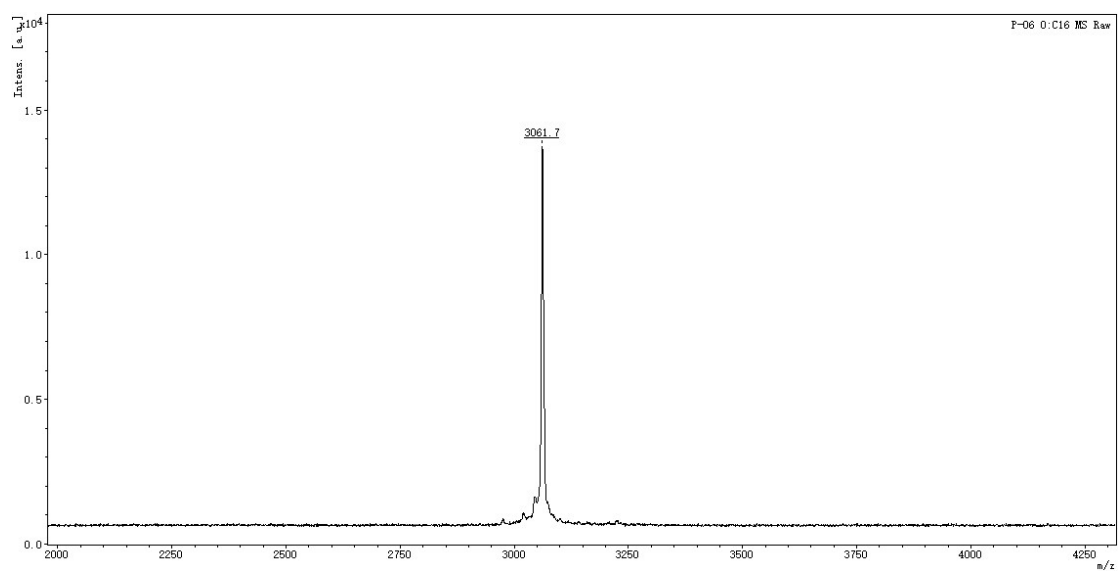

P-07

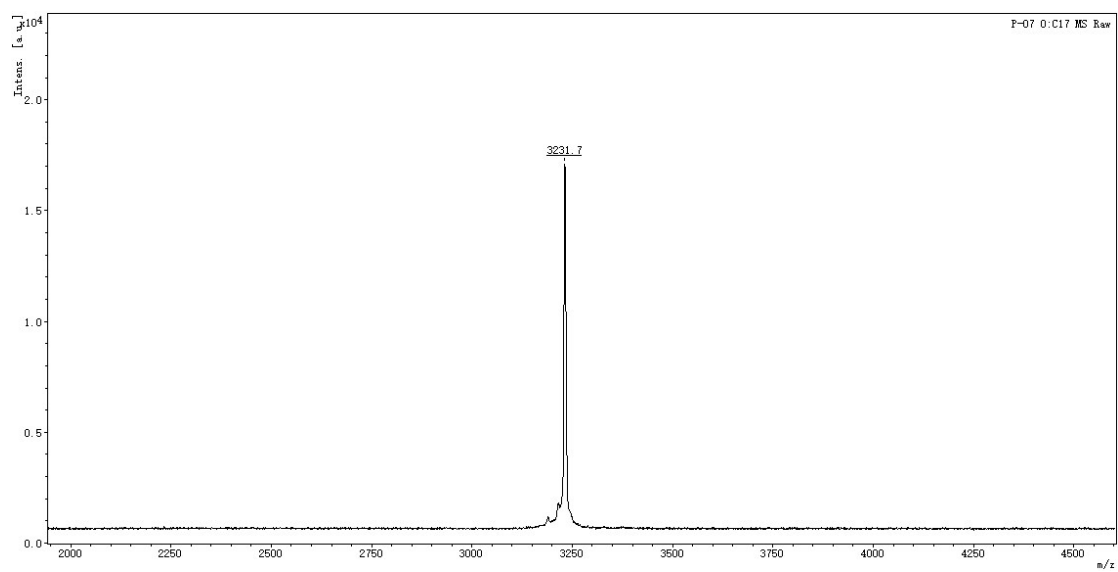

P-08

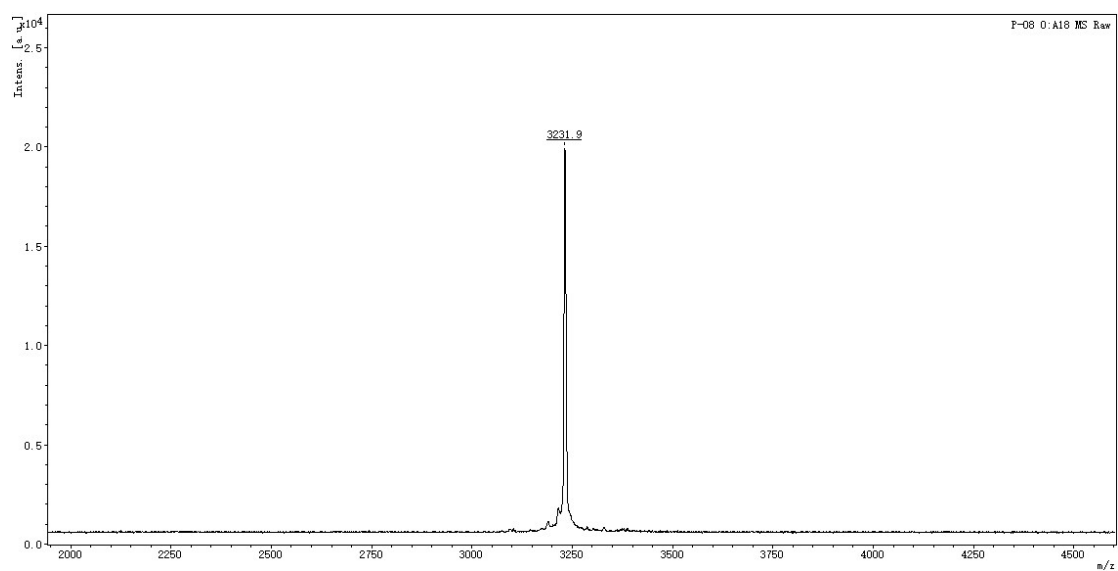

Figure S2 RP-HPLC of peptide vectors

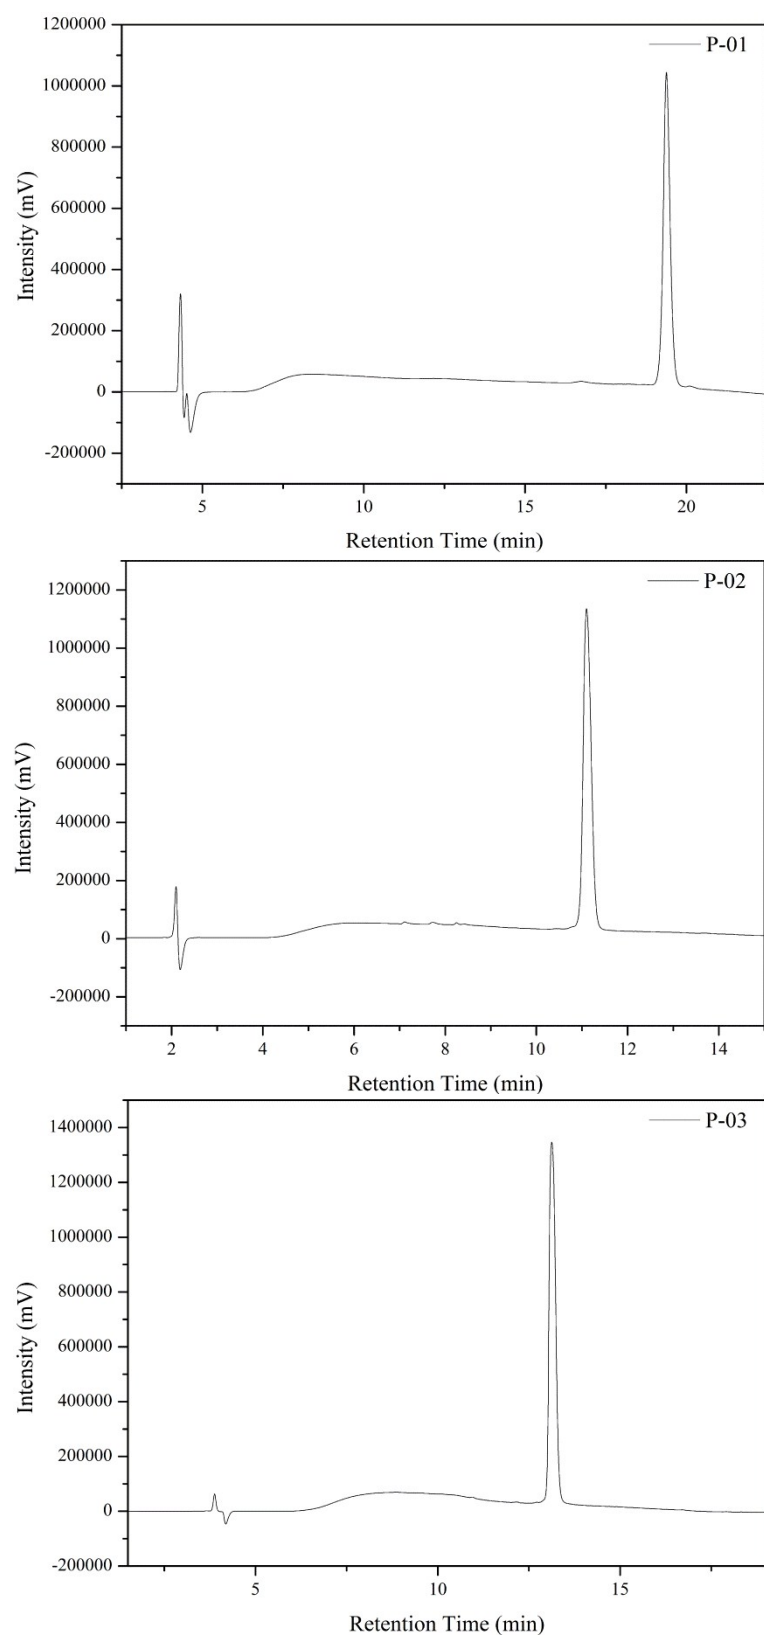

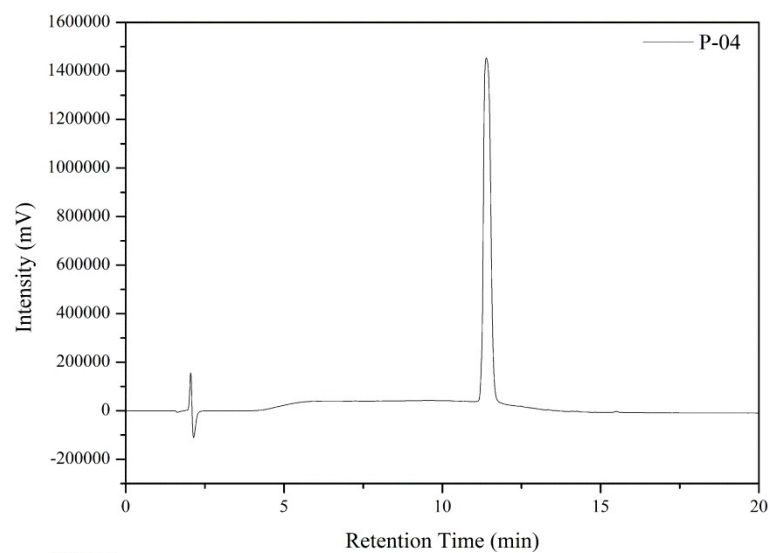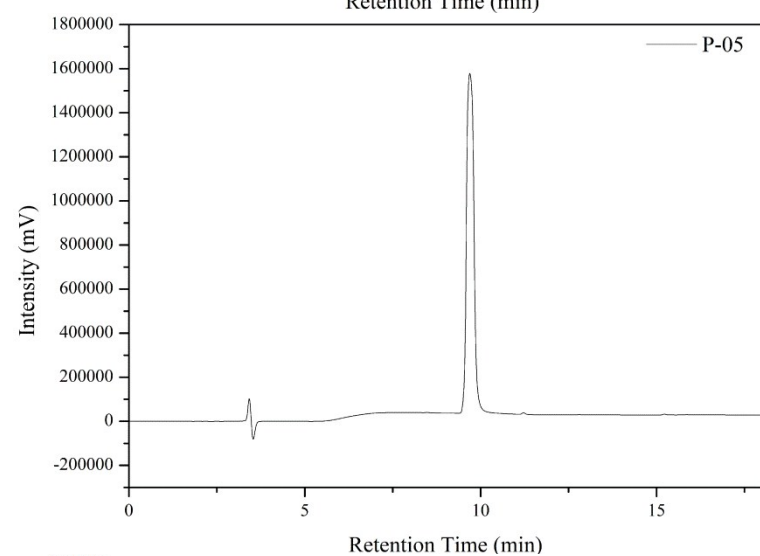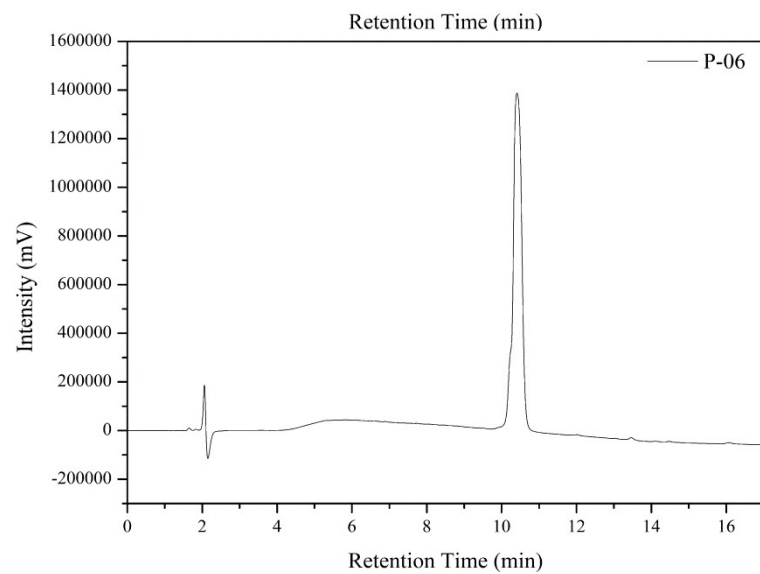

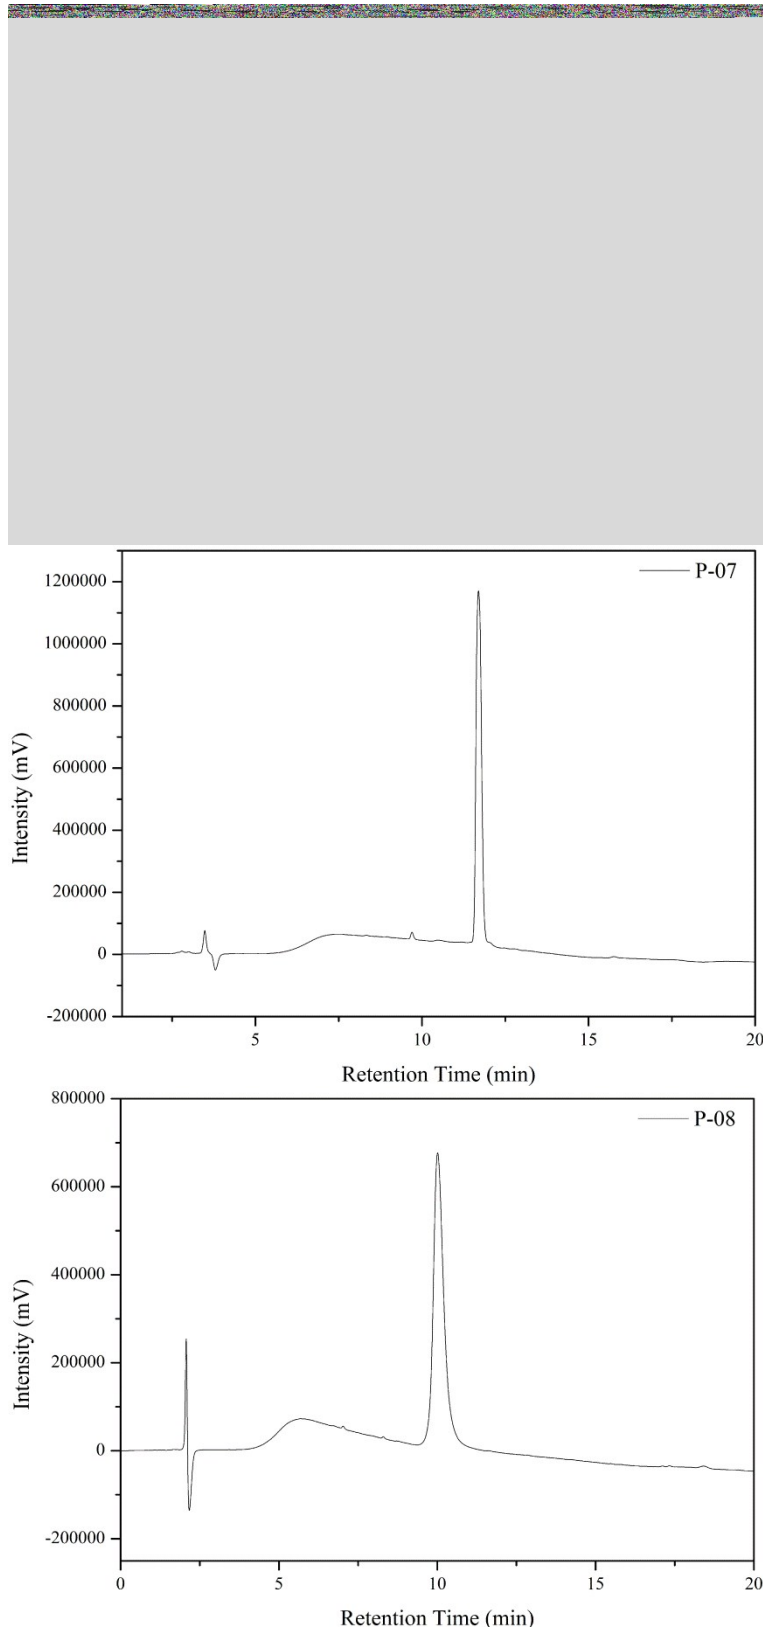

Figure S3 Agarose gel electrophoresis assay of naked DNA and P-01/DNA complexes in the presence of DNase I at different incubation time. Naked DNA



without the addition of DNase I was used as control.

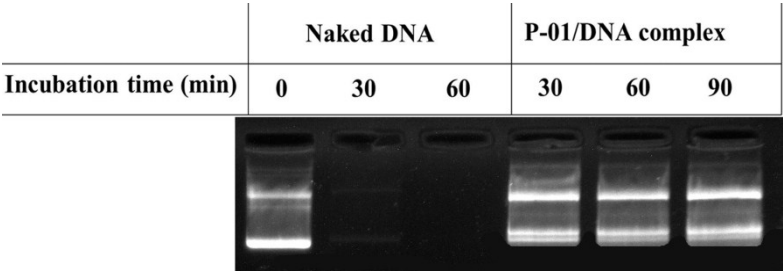

Figure S4 TEM photographs of peptide/DNA complexes at an N/P ratio of 6. (A) P-02, (B) P-03, (C) P-04, (D) P-08. Scale bar was 100 nm.

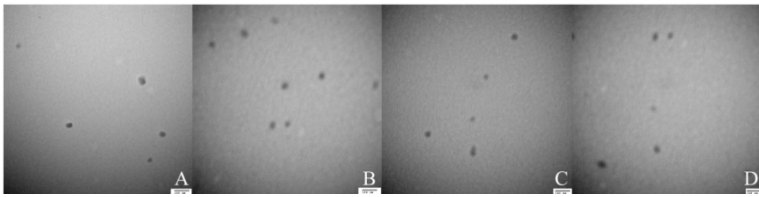

Figure S5 In vitro luciferase expression levels in 293T cells of P-01/DNA complexes at different N/P ratios. Data are mean  $\pm$  SD (n = 3).

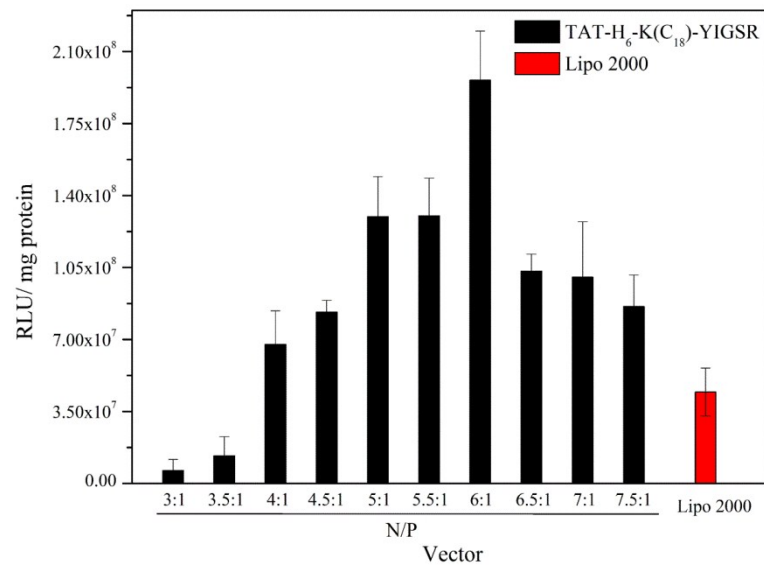

Figure S6 In vitro luciferase expression levels in B16F10 cells of Lipo 2000/DNA complexes with different molar weight ratio of YIGSR.

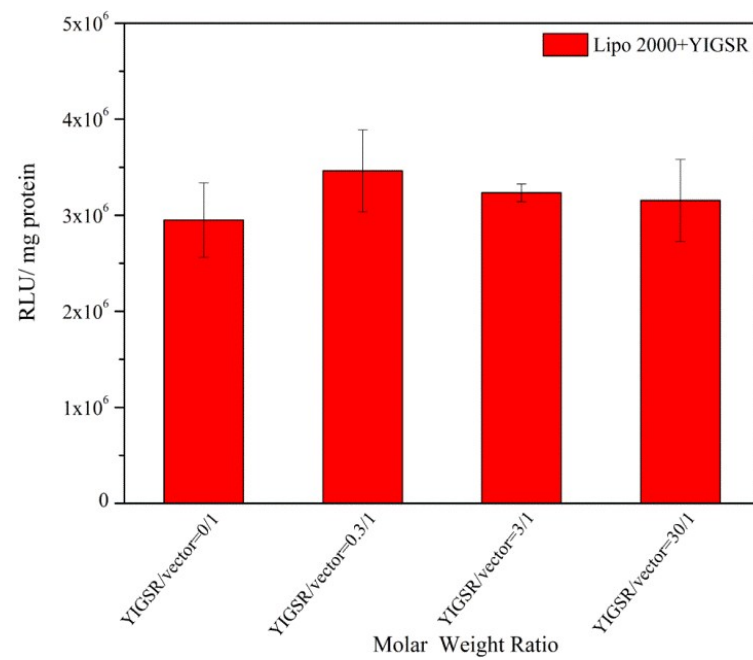

Figure S7 CD spectra of peptide vectors at 50  $\mu\text{mol L}^{-1}$  in 50% trifluoroethanol/PBS solution.

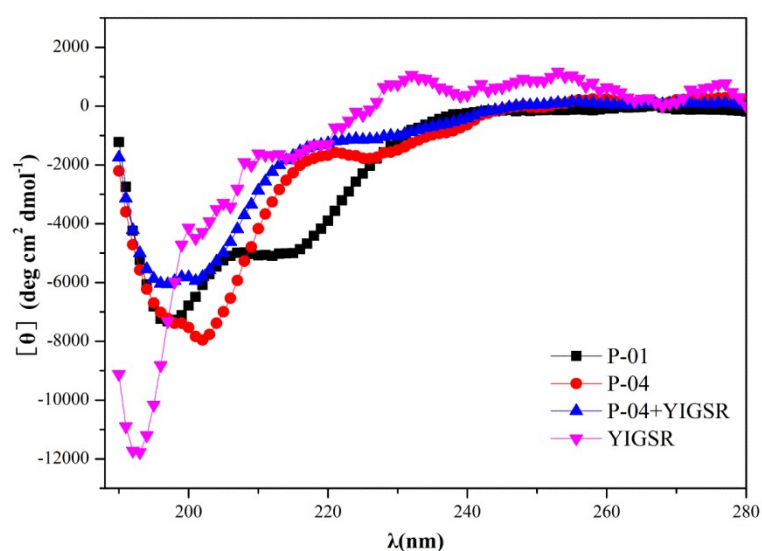

Figure S8 FACS assays of cellular uptake of different peptide/DNA complexes at an N/P ratio of 6 and Lipo2000 in B16F10 cells. DNA was labelled with YOYO-1.

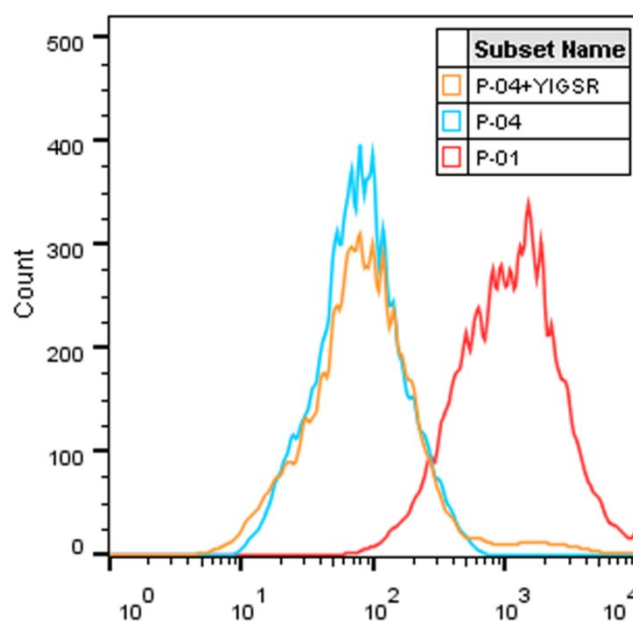

Figure S9 In vivo fluorescence imaging of the Zebrafish microinjected with P-01/PGL3 at N/P ratio 6 (left) and naked PGL3 (right). The control (middle) is the Zebrafish without any administration.

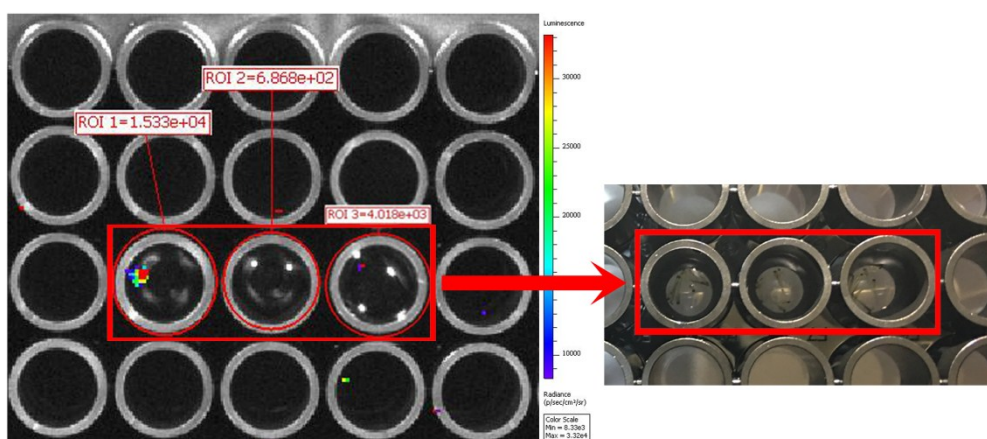

Table S1 Percentage of  $\alpha$ -helix for peptide vectors

| Compounds | Percentage of $\alpha$ -helix (%) |
|-----------|-----------------------------------|
| P-01      | 34.87                             |
| P-02      | 20.05                             |
| P-03      | 30.1                              |
| P-04      | 26.7                              |
| P-05      | N.C. *                            |
| P-06      | 16.6                              |
| P-07      | 35.84                             |
| P-08      | 23.4                              |

\* Not Calculated
